# Supplementary material for: Terminal Unfolded Protein Responses-related genes predict prognosis and associate with proliferation and apoptosis in clear cell renal cell carcinoma
Source: Research Square preprint supplement (doi:10.21203/rs.3.rs-3258029/v2), 2024-01-19
Supplement: Supplementary file 1 [file 3cecf446fcd3f8b2a94c2b3c.docx]

Table S1. STT3B silencing vector sequences

| **Name** | **Sequences** |
| --- | --- |
| sh-STT3B-1139 | GGTCAGTAGCTGGATCCTTTG |
| sh-STT3B-1250 | GCTGCTGCTTATCCTATTTCT |
| sh-STT3B-1579 | GCAGGTGCTGTGTTCCTTAGT |
| sh-NC | TTCTCCGAACGTGTCACGT |

Table S2. RNA primers in this study

| **Gene** | **Forward** | **Reverse** |
| --- | --- | --- |
| GAPDH | CGCTGAGTACGTCGTGGAGTC | GCTGATGATCTTGAGGCTGTTGTC |
| ERN1 | CACAGTGACGCTTCCTGAAAC | GCCATCATTAGGATCTGGGAGA |
| XBP1 | CCTTGTAGTTGAGAACCAGG | GGGGCTTGGTATATATGTGG |
| ATF6 | TCCTCGGTCAGTGGACTCTTA | CTTGGGCTGAATTGAAGGTTTTG |
| HSPA5 | CATCACGCCGTCCTATGTCG | CGTCAAAGACCGTGTTCTCG |
| EIF2AK3 | ACGATGAGACAGAGTTGCGAC | ATCCAAGGCAGCAATTCTCCC |
| DDIT3 | GGAAACAGAGTGGTCATTCCC | CTGCTTGAGCCGTTCATTCTC |
| ETF1 | CACGAGTGGCAAAAATGTTAGC | CCAGGACTGAAAGGCGGTTTA |
| GARS1 | AAAGCCCGCAAGAGGGTTC | CTTCCATTTTTGCTCGGTCTACA |
| QRICH1 | GAAGAGTACATCCGAGTAAAGGC | GCCCCTTAGAGGCCAGTGA |
| SRPRA | TTGATAGATGACGTGCATCGG | CGGATCTTACTGCTCTCCTCT |
| SRP72 | GCGCTGTGGAGTGAAGTGAA | CAGGGCAGTTACGTCATCTTT |
| STK40 | ATGAAGCGGAGAGCATCAGAC | CCTCGCCAAACACTGCACTAT |
| STT3B | AGTAGGTGGTACTGTTTACCCAG | AAGTTGGTGCAAGGAACACAC |
| TGIF1 | GGGATTGGCTGTATGAGCACC | GGCGGGAAATTGTGAACTGA |
| USO1 | GCTTTGTGACAGAGTAGCTTCA | CCACTTCCAAGCGGTATTTCT |
